# Supplementary material
Source: PubMed Central journal article supplement (PMC1458999)

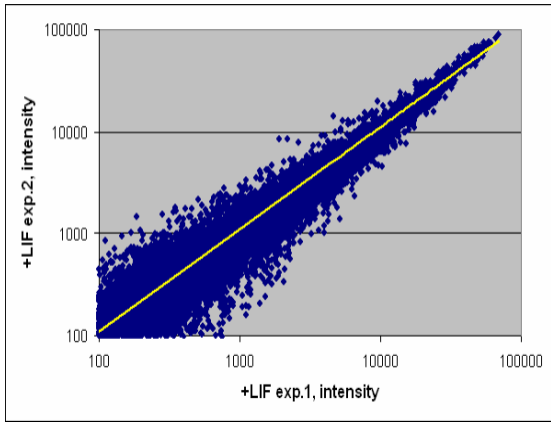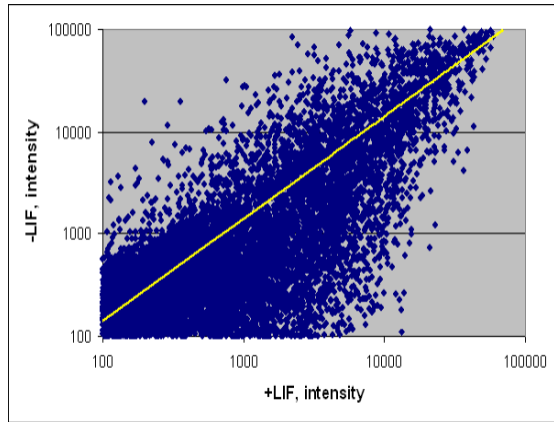

Supplement: pnas_0509861103_1.pdf [file pnas_0509861103_1.pdf]

Cited1

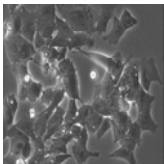

Cited2

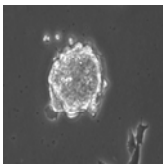

Bmi1

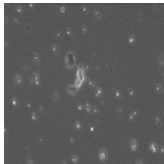

Nspc1

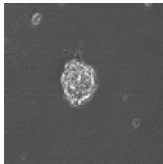

Supplement: pnas_0509861103_2.pdf [file pnas_0509861103_2.pdf]

**A**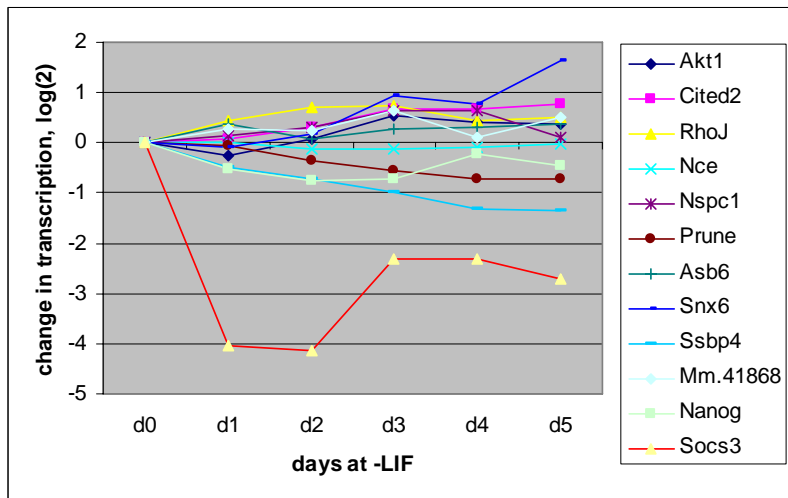**B**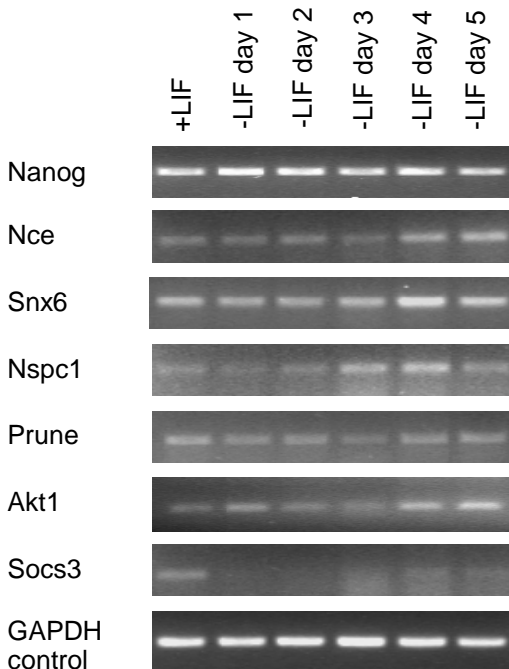

Supplement: pnas_0509861103_3.pdf [file pnas_0509861103_3.pdf]
